# Supplementary material
Source: publisher figshare collection journal article supplement (https://acs.figshare.com/ndownloader/files/4371544)
Supplement: Supplementary file 1 [file 4371544]

 
data_ydwws10 
  
_audit_creation_method            SHELXL-97 
_chemical_name_systematic 
; 
 ? 
; 
_chemical_name_common             ? 
_chemical_melting_point           ? 
_chemical_formula_moiety          ? 
_chemical_formula_sum 
 'C22 H26 B Cl2 F7 O3 S' 
_chemical_formula_weight          585.20 
  
loop_ 
 _atom_type_symbol 
 _atom_type_description 
 _atom_type_scat_dispersion_real 
 _atom_type_scat_dispersion_imag 
 _atom_type_scat_source 
 'C'  'C'   0.0033   0.0016 
 'International Tables Vol C Tables 4.2.6.8 and 6.1.1.4' 
 'H'  'H'   0.0000   0.0000 
 'International Tables Vol C Tables 4.2.6.8 and 6.1.1.4' 
 'B'  'B'   0.0013   0.0007 
 'International Tables Vol C Tables 4.2.6.8 and 6.1.1.4' 
 'Cl'  'Cl'   0.1484   0.1585 
 'International Tables Vol C Tables 4.2.6.8 and 6.1.1.4' 
 'F'  'F'   0.0171   0.0103 
 'International Tables Vol C Tables 4.2.6.8 and 6.1.1.4' 
 'O'  'O'   0.0106   0.0060 
 'International Tables Vol C Tables 4.2.6.8 and 6.1.1.4' 
 'S'  'S'   0.1246   0.1234 
 'International Tables Vol C Tables 4.2.6.8 and 6.1.1.4' 
  
_symmetry_cell_setting            Monoclinic 
_symmetry_space_group_name_H-M    P2(1)/c 
  
loop_ 
 _symmetry_equiv_pos_as_xyz 
 'x, y, z' 
 '-x, y+1/2, -z+1/2' 
 '-x, -y, -z' 
 'x, -y-1/2, z-1/2' 
  
_cell_length_a                    26.4514(19) 
_cell_length_b                    9.6762(7) 
_cell_length_c                    19.9287(14) 
_cell_angle_alpha                 90.00 
_cell_angle_beta                  95.3800(10) 
_cell_angle_gamma                 90.00 
_cell_volume                      5078.3(6) 
_cell_formula_units_Z             8 
_cell_measurement_temperature     150(2) 
_cell_measurement_reflns_used     9928 
_cell_measurement_theta_min       2.44 
_cell_measurement_theta_max       28.58 
  
_exptl_crystal_description        block 
_exptl_crystal_colour             colorless 
_exptl_crystal_size_max           0.19 
_exptl_crystal_size_mid           0.11 
_exptl_crystal_size_min           0.04 
_exptl_crystal_density_meas       ? 
_exptl_crystal_density_diffrn     1.531 
_exptl_crystal_density_method     'not measured' 
_exptl_crystal_F_000              2400 
_exptl_absorpt_coefficient_mu     0.413 
_exptl_absorpt_correction_type    empirical 
_exptl_absorpt_correction_T_min   0.9256 
_exptl_absorpt_correction_T_max   0.9837 
_exptl_absorpt_process_details    SADABS 
  
_exptl_special_details 
; 
 ? 
; 
  
_diffrn_ambient_temperature       150(2) 
_diffrn_radiation_wavelength      0.71073 
_diffrn_radiation_type            MoK\a 
_diffrn_radiation_source          'fine-focus sealed tube' 
_diffrn_radiation_monochromator   graphite 
_diffrn_measurement_device_type   'Bruker APEX-II CCD' 
_diffrn_measurement_method        '\f and \w scans' 
_diffrn_detector_area_resol_mean  ? 
_diffrn_reflns_number             80468 
_diffrn_reflns_av_R_equivalents   0.0906 
_diffrn_reflns_av_sigmaI/netI     0.0758 
_diffrn_reflns_limit_h_min        -37 
_diffrn_reflns_limit_h_max        37 
_diffrn_reflns_limit_k_min        -13 
_diffrn_reflns_limit_k_max        13 
_diffrn_reflns_limit_l_min        -28 
_diffrn_reflns_limit_l_max        28 
_diffrn_reflns_theta_min          1.55 
_diffrn_reflns_theta_max          30.54 
_reflns_number_total              15529 
_reflns_number_gt                 8628 
_reflns_threshold_expression      >2sigma(I) 
  
_computing_data_collection        'Bruker APEX2' 
_computing_cell_refinement        'Bruker SAINT' 
_computing_data_reduction         'Bruker SAINT' 
_computing_structure_solution     'SHELXS-97 (Sheldrick, 2008)' 
_computing_structure_refinement   'SHELXL-97 (Sheldrick, 2008)' 
_computing_molecular_graphics     'Bruker SHELXTL' 
_computing_publication_material   'Bruker SHELXTL' 
  
_refine_special_details 
; 
 Refinement of F^2^ against ALL reflections.  The weighted R-factor wR and 
 goodness of fit S are based on F^2^, conventional R-factors R are based 
 on F, with F set to zero for negative F^2^. The threshold expression of 
 F^2^ > 2sigma(F^2^) is used only for calculating R-factors(gt) etc. and is 
 not relevant to the choice of reflections for refinement.  R-factors based 
 on F^2^ are statistically about twice as large as those based on F, and R- 
 factors based on ALL data will be even larger. 
; 
  
_refine_ls_structure_factor_coef  Fsqd 
_refine_ls_matrix_type            full 
_refine_ls_weighting_scheme       calc 
_refine_ls_weighting_details 
 'calc w=1/[\s^2^(Fo^2^)+(0.0944P)^2^+3.4851P] where P=(Fo^2^+2Fc^2^)/3' 
_atom_sites_solution_primary      direct 
_atom_sites_solution_secondary    difmap 
_atom_sites_solution_hydrogens    geom 
_refine_ls_hydrogen_treatment     CONSTR 
_refine_ls_extinction_method      none 
_refine_ls_extinction_coef        ? 
_refine_ls_number_reflns          15529 
_refine_ls_number_parameters      653 
_refine_ls_number_restraints      0 
_refine_ls_R_factor_all           0.1353 
_refine_ls_R_factor_gt            0.0675 
_refine_ls_wR_factor_ref          0.2096 
_refine_ls_wR_factor_gt           0.1711 
_refine_ls_goodness_of_fit_ref    1.034 
_refine_ls_restrained_S_all       1.034 
_refine_ls_shift/su_max           0.000 
_refine_ls_shift/su_mean          0.000 
  
loop_ 
 _atom_site_label 
 _atom_site_type_symbol 
 _atom_site_fract_x 
 _atom_site_fract_y 
 _atom_site_fract_z 
 _atom_site_U_iso_or_equiv 
 _atom_site_adp_type 
 _atom_site_occupancy 
 _atom_site_symmetry_multiplicity 
 _atom_site_calc_flag 
 _atom_site_refinement_flags 
 _atom_site_disorder_assembly 
 _atom_site_disorder_group 
S1 S 0.03182(3) 0.21480(7) 0.12091(4) 0.01976(15) Uani 1 1 d . . . 
F1 F 0.22406(10) 0.3738(3) -0.04341(12) 0.0666(8) Uani 1 1 d . . . 
F2 F 0.28963(8) 0.3630(3) 0.02912(17) 0.0791(10) Uani 1 1 d . . . 
F3 F 0.23307(9) 0.5162(2) 0.03778(14) 0.0568(6) Uani 1 1 d . . . 
O1 O 0.23157(9) 0.1839(3) 0.08857(13) 0.0379(6) Uani 1 1 d . . . 
O2 O 0.16410(7) 0.3287(2) 0.06435(10) 0.0242(4) Uani 1 1 d . . . 
O3 O 0.15979(9) 0.1779(3) 0.29909(12) 0.0357(5) Uani 1 1 d . . . 
C1 C 0.24029(12) 0.3861(4) 0.0216(2) 0.0379(8) Uani 1 1 d . . . 
C2 C 0.12874(14) 0.5314(4) 0.30676(17) 0.0359(8) Uani 1 1 d . . . 
H2A H 0.1174 0.6002 0.3389 0.043 Uiso 1 1 calc R . . 
H2B H 0.1654 0.5464 0.3028 0.043 Uiso 1 1 calc R . . 
C3 C -0.10263(13) 0.4155(4) 0.12587(18) 0.0341(8) Uani 1 1 d . . . 
H3A H -0.1185 0.4808 0.1526 0.041 Uiso 1 1 calc R . . 
C4 C 0.12049(13) 0.3849(4) 0.33347(16) 0.0349(8) Uani 1 1 d . . . 
H4A H 0.1422 0.3714 0.3762 0.042 Uiso 1 1 calc R . . 
H4B H 0.0846 0.3746 0.3431 0.042 Uiso 1 1 calc R . . 
C5 C -0.13014(12) 0.3562(4) 0.07113(18) 0.0335(8) Uani 1 1 d . . . 
H5A H -0.1648 0.3801 0.0608 0.040 Uiso 1 1 calc R . . 
C6 C 0.05645(12) 0.3477(3) 0.00583(14) 0.0256(6) Uani 1 1 d . . . 
H6A H 0.0827 0.3897 -0.0191 0.038 Uiso 1 1 calc R . . 
H6B H 0.0268 0.4088 0.0039 0.038 Uiso 1 1 calc R . . 
H6C H 0.0465 0.2583 -0.0144 0.038 Uiso 1 1 calc R . . 
C7 C 0.21206(12) 0.2849(4) 0.06374(16) 0.0285(7) Uani 1 1 d . . . 
C8 C -0.10745(12) 0.2619(4) 0.03116(17) 0.0313(7) Uani 1 1 d . . . 
H8A H -0.1262 0.2239 -0.0075 0.038 Uiso 1 1 calc R . . 
C9 C 0.12296(12) 0.1054(3) 0.04411(16) 0.0286(7) Uani 1 1 d . . . 
H9A H 0.1538 0.0504 0.0544 0.043 Uiso 1 1 calc R . . 
H9B H 0.1202 0.1326 -0.0035 0.043 Uiso 1 1 calc R . . 
H9C H 0.0932 0.0503 0.0530 0.043 Uiso 1 1 calc R . . 
C10 C 0.09915(13) 0.5514(3) 0.23825(16) 0.0291(7) Uani 1 1 d . . . 
H10A H 0.1052 0.6459 0.2217 0.035 Uiso 1 1 calc R . . 
H10B H 0.0624 0.5421 0.2430 0.035 Uiso 1 1 calc R . . 
C11 C -0.05203(12) 0.3813(3) 0.14256(16) 0.0284(7) Uani 1 1 d . . . 
H11A H -0.0329 0.4234 0.1798 0.034 Uiso 1 1 calc R . . 
C12 C 0.13722(11) 0.1995(3) 0.16405(15) 0.0236(6) Uani 1 1 d . . . 
H12A H 0.1270 0.1028 0.1717 0.028 Uiso 1 1 calc R . . 
H12B H 0.1743 0.2063 0.1761 0.028 Uiso 1 1 calc R . . 
C13 C -0.05728(11) 0.2227(3) 0.04749(15) 0.0262(6) Uani 1 1 d . . . 
H13A H -0.0417 0.1559 0.0212 0.031 Uiso 1 1 calc R . . 
C14 C 0.13289(11) 0.2764(3) 0.28392(15) 0.0258(6) Uani 1 1 d . . . 
C15 C 0.12544(11) 0.2349(3) 0.08840(14) 0.0212(6) Uani 1 1 d . . . 
C16 C 0.08429(11) 0.4630(3) 0.11744(14) 0.0209(6) Uani 1 1 d . . . 
H16A H 0.0505 0.5025 0.1237 0.025 Uiso 1 1 calc R . . 
H16B H 0.1023 0.5291 0.0901 0.025 Uiso 1 1 calc R . . 
C17 C 0.05319(11) 0.2528(3) 0.20833(14) 0.0226(6) Uani 1 1 d . . . 
H17A H 0.0329 0.3292 0.2252 0.027 Uiso 1 1 calc R . . 
H17B H 0.0493 0.1704 0.2368 0.027 Uiso 1 1 calc R . . 
C18 C 0.10992(11) 0.2949(3) 0.21049(14) 0.0211(6) Uani 1 1 d . . . 
C19 C -0.03036(11) 0.2834(3) 0.10302(14) 0.0209(6) Uani 1 1 d . . . 
C20 C 0.11454(11) 0.4466(3) 0.18704(14) 0.0213(6) Uani 1 1 d . . . 
H20A H 0.1511 0.4635 0.1808 0.026 Uiso 1 1 calc R . . 
C21 C 0.07713(11) 0.3266(3) 0.07901(14) 0.0199(5) Uani 1 1 d . . . 
S2 S 0.45900(3) 0.82135(8) 0.37301(4) 0.02176(16) Uani 1 1 d . . . 
F4 F 0.28252(18) 0.4975(9) 0.5050(4) 0.286(6) Uani 1 1 d . . . 
F5 F 0.2621(2) 0.4475(4) 0.4119(5) 0.237(5) Uani 1 1 d . . . 
F6 F 0.21290(10) 0.5549(4) 0.45984(18) 0.0914(11) Uani 1 1 d . . . 
O4 O 0.26216(9) 0.7807(3) 0.42471(14) 0.0457(7) Uani 1 1 d . . . 
O5 O 0.33295(8) 0.6464(2) 0.41982(11) 0.0290(5) Uani 1 1 d . . . 
O6 O 0.32198(9) 0.9192(2) 0.21087(11) 0.0326(5) Uani 1 1 d . . . 
C22 C 0.26010(16) 0.5440(6) 0.4526(3) 0.0617(13) Uani 1 1 d . . . 
C23 C 0.54322(12) 0.6907(4) 0.32638(18) 0.0335(7) Uani 1 1 d . . . 
H23A H 0.5237 0.6726 0.2848 0.040 Uiso 1 1 calc R . . 
C24 C 0.36150(16) 0.5951(4) 0.15685(18) 0.0432(9) Uani 1 1 d . . . 
H24A H 0.3255 0.5692 0.1594 0.052 Uiso 1 1 calc R . . 
H24B H 0.3733 0.5503 0.1165 0.052 Uiso 1 1 calc R . . 
C25 C 0.59981(12) 0.7411(4) 0.44904(19) 0.0376(8) Uani 1 1 d . . . 
H25A H 0.6191 0.7555 0.4911 0.045 Uiso 1 1 calc R . . 
C26 C 0.59384(13) 0.6508(4) 0.3369(2) 0.0394(8) Uani 1 1 d . . . 
H26A H 0.6094 0.6061 0.3016 0.047 Uiso 1 1 calc R . . 
C27 C 0.62176(13) 0.6751(4) 0.3975(2) 0.0391(8) Uani 1 1 d . . . 
H27A H 0.6562 0.6464 0.4040 0.047 Uiso 1 1 calc R . . 
C28 C 0.37023(13) 0.8621(4) 0.46552(16) 0.0344(8) Uani 1 1 d . . . 
H28A H 0.3384 0.9142 0.4639 0.052 Uiso 1 1 calc R . . 
H28B H 0.3986 0.9262 0.4625 0.052 Uiso 1 1 calc R . . 
H28C H 0.3751 0.8109 0.5081 0.052 Uiso 1 1 calc R . . 
C30 C 0.36551(14) 0.7521(4) 0.14989(16) 0.0372(8) Uani 1 1 d . . . 
H30A H 0.4006 0.7768 0.1412 0.045 Uiso 1 1 calc R . . 
H30B H 0.3424 0.7832 0.1109 0.045 Uiso 1 1 calc R . . 
C31 C 0.55002(12) 0.7863(4) 0.43983(16) 0.0292(7) Uani 1 1 d . . . 
H31A H 0.5352 0.8356 0.4743 0.035 Uiso 1 1 calc R . . 
C32 C 0.39319(14) 0.5430(4) 0.21957(17) 0.0349(8) Uani 1 1 d . . . 
H32A H 0.4295 0.5611 0.2150 0.042 Uiso 1 1 calc R . . 
H32B H 0.3886 0.4419 0.2235 0.042 Uiso 1 1 calc R . . 
C33 C 0.41164(11) 0.5675(3) 0.34646(16) 0.0253(6) Uani 1 1 d . . . 
H33A H 0.3966 0.4841 0.3654 0.030 Uiso 1 1 calc R . . 
H33B H 0.4455 0.5419 0.3331 0.030 Uiso 1 1 calc R . . 
C34 C 0.44240(12) 0.6198(4) 0.46747(16) 0.0314(7) Uani 1 1 d . . . 
H34A H 0.4176 0.5623 0.4882 0.047 Uiso 1 1 calc R . . 
H34B H 0.4534 0.6956 0.4981 0.047 Uiso 1 1 calc R . . 
H34C H 0.4719 0.5634 0.4587 0.047 Uiso 1 1 calc R . . 
C35 C 0.35209(11) 0.8249(3) 0.21220(15) 0.0261(6) Uani 1 1 d . . . 
C36 C 0.43409(11) 0.8257(3) 0.28445(14) 0.0257(6) Uani 1 1 d . . . 
H36A H 0.4352 0.9212 0.2668 0.031 Uiso 1 1 calc R . . 
H36B H 0.4547 0.7657 0.2574 0.031 Uiso 1 1 calc R . . 
C37 C 0.35176(11) 0.8320(3) 0.33861(14) 0.0241(6) Uani 1 1 d . . . 
H37A H 0.3146 0.8214 0.3283 0.029 Uiso 1 1 calc R . . 
H37B H 0.3592 0.9321 0.3427 0.029 Uiso 1 1 calc R . . 
C38 C 0.36798(11) 0.7611(3) 0.40683(15) 0.0237(6) Uani 1 1 d . . . 
C39 C 0.37791(11) 0.6137(3) 0.28359(15) 0.0236(6) Uani 1 1 d . . . 
H39A H 0.3423 0.5848 0.2897 0.028 Uiso 1 1 calc R . . 
C39A C 0.28478(12) 0.6746(4) 0.43000(16) 0.0351(8) Uani 1 1 d . . . 
C40 C 0.52222(11) 0.7573(3) 0.37826(15) 0.0236(6) Uani 1 1 d . . . 
C41 C 0.37858(11) 0.7732(3) 0.28001(14) 0.0211(6) Uani 1 1 d . . . 
C42 C 0.41809(11) 0.6790(3) 0.40125(14) 0.0217(6) Uani 1 1 d . . . 
F7 F -0.00314(8) 0.22479(19) 0.34685(10) 0.0358(5) Uani 1 1 d . . . 
F8 F -0.01672(9) 0.4401(2) 0.30514(10) 0.0469(6) Uani 1 1 d . . . 
F9 F 0.00192(8) 0.4108(2) 0.41696(10) 0.0384(5) Uani 1 1 d . . . 
F10 F -0.07446(8) 0.3428(3) 0.36837(14) 0.0593(7) Uani 1 1 d . . . 
B1 B -0.02342(14) 0.3532(4) 0.35940(19) 0.0278(7) Uani 1 1 d . . . 
F11 F 0.48062(8) 0.6251(2) 0.07280(11) 0.0473(6) Uani 1 1 d . . . 
F12 F 0.55995(9) 0.7021(4) 0.09898(13) 0.0868(11) Uani 1 1 d . . . 
F13 F 0.51646(12) 0.6023(3) 0.17847(11) 0.0667(8) Uani 1 1 d . . . 
F14 F 0.49482(10) 0.8125(2) 0.14081(14) 0.0598(7) Uani 1 1 d . . . 
B2 B 0.51357(15) 0.6880(5) 0.1221(2) 0.0344(9) Uani 1 1 d . . . 
C43 C 0.19973(17) 0.8611(4) 0.1876(2) 0.0547(11) Uani 1 1 d . . . 
H43A H 0.1639 0.8882 0.1759 0.066 Uiso 1 1 calc R . . 
H43B H 0.2214 0.9389 0.1754 0.066 Uiso 1 1 calc R . . 
Cl1 Cl 0.33623(4) 0.22591(11) 0.32536(7) 0.0605(3) Uani 1 1 d . . . 
Cl2 Cl 0.26006(4) 0.37639(13) 0.23802(7) 0.0673(4) Uani 1 1 d . . . 
C44 C 0.27855(16) 0.2143(5) 0.2739(3) 0.0693(16) Uani 1 1 d . . . 
H44A H 0.2517 0.1802 0.3011 0.083 Uiso 1 1 calc R . . 
H44B H 0.2823 0.1467 0.2374 0.083 Uiso 1 1 calc R . . 
Cl3 Cl 0.21324(5) 0.71616(14) 0.14030(8) 0.0755(4) Uani 1 1 d . . . 
Cl4 Cl 0.20967(5) 0.83232(16) 0.27427(7) 0.0713(4) Uani 1 1 d . . . 
  
loop_ 
 _atom_site_aniso_label 
 _atom_site_aniso_U_11 
 _atom_site_aniso_U_22 
 _atom_site_aniso_U_33 
 _atom_site_aniso_U_23 
 _atom_site_aniso_U_13 
 _atom_site_aniso_U_12 
S1 0.0186(3) 0.0204(3) 0.0204(3) -0.0011(3) 0.0024(2) -0.0018(3) 
F1 0.0703(18) 0.095(2) 0.0375(13) 0.0080(13) 0.0193(12) -0.0155(15) 
F2 0.0210(11) 0.091(2) 0.128(3) 0.0520(19) 0.0212(14) 0.0067(12) 
F3 0.0567(15) 0.0397(13) 0.0771(17) 0.0054(12) 0.0223(13) -0.0091(11) 
O1 0.0298(12) 0.0383(14) 0.0469(15) 0.0057(12) 0.0109(11) 0.0106(11) 
O2 0.0188(10) 0.0269(11) 0.0278(11) 0.0015(9) 0.0070(8) 0.0010(8) 
O3 0.0351(13) 0.0374(13) 0.0333(13) 0.0111(10) -0.0037(10) 0.0006(11) 
C1 0.0219(16) 0.046(2) 0.047(2) 0.0066(17) 0.0099(15) 0.0027(15) 
C2 0.043(2) 0.0348(19) 0.0291(17) -0.0102(14) -0.0031(15) 0.0007(15) 
C3 0.0315(17) 0.0341(18) 0.0386(19) 0.0008(15) 0.0129(15) 0.0060(14) 
C4 0.0338(18) 0.052(2) 0.0177(15) -0.0008(14) -0.0020(13) -0.0022(16) 
C5 0.0202(15) 0.0340(18) 0.046(2) 0.0122(15) 0.0044(14) 0.0023(13) 
C6 0.0255(15) 0.0324(17) 0.0186(14) 0.0028(12) 0.0010(11) -0.0003(12) 
C7 0.0224(15) 0.0347(18) 0.0290(16) -0.0022(13) 0.0047(12) 0.0017(13) 
C8 0.0224(15) 0.0389(19) 0.0312(17) 0.0023(14) -0.0051(13) -0.0049(13) 
C9 0.0310(16) 0.0255(16) 0.0303(16) -0.0068(13) 0.0087(13) 0.0011(13) 
C10 0.0330(17) 0.0261(16) 0.0277(16) -0.0059(13) 0.0008(13) 0.0003(13) 
C11 0.0287(16) 0.0294(17) 0.0276(16) -0.0023(13) 0.0046(13) -0.0008(13) 
C12 0.0239(14) 0.0200(14) 0.0268(15) 0.0025(11) 0.0018(12) 0.0031(11) 
C13 0.0221(14) 0.0316(16) 0.0249(15) -0.0020(13) 0.0016(12) -0.0039(12) 
C14 0.0203(14) 0.0345(17) 0.0226(14) 0.0055(13) 0.0010(11) -0.0057(13) 
C15 0.0205(13) 0.0210(14) 0.0228(14) 0.0001(11) 0.0053(11) 0.0004(11) 
C16 0.0217(14) 0.0183(14) 0.0227(14) 0.0011(11) 0.0015(11) 0.0008(11) 
C17 0.0227(14) 0.0258(15) 0.0191(13) 0.0012(11) 0.0009(11) -0.0032(11) 
C18 0.0223(14) 0.0208(14) 0.0199(13) 0.0007(11) 0.0005(11) -0.0007(11) 
C19 0.0192(13) 0.0227(14) 0.0210(13) 0.0011(11) 0.0028(11) -0.0030(11) 
C20 0.0219(14) 0.0193(14) 0.0223(14) -0.0013(11) 0.0009(11) -0.0010(11) 
C21 0.0212(13) 0.0191(13) 0.0199(13) 0.0005(11) 0.0038(11) 0.0002(11) 
S2 0.0185(3) 0.0246(4) 0.0218(3) 0.0008(3) 0.0004(3) -0.0021(3) 
F4 0.105(3) 0.393(10) 0.336(8) 0.333(9) -0.101(5) -0.130(5) 
F5 0.208(6) 0.062(3) 0.485(12) -0.074(5) 0.263(8) -0.062(3) 
F6 0.0379(15) 0.111(3) 0.130(3) 0.027(2) 0.0334(17) -0.0187(16) 
O4 0.0290(13) 0.0596(18) 0.0503(16) 0.0029(14) 0.0124(12) 0.0097(13) 
O5 0.0195(10) 0.0372(13) 0.0310(12) 0.0069(10) 0.0057(9) -0.0023(9) 
O6 0.0302(12) 0.0340(13) 0.0325(12) 0.0075(10) -0.0029(10) 0.0014(10) 
C22 0.033(2) 0.066(3) 0.087(4) 0.032(3) 0.012(2) -0.005(2) 
C23 0.0265(16) 0.0378(19) 0.0356(18) -0.0113(15) 0.0002(13) -0.0010(14) 
C24 0.055(2) 0.049(2) 0.0254(17) -0.0127(16) 0.0021(16) -0.0028(19) 
C25 0.0220(16) 0.050(2) 0.0390(19) 0.0036(16) -0.0050(14) -0.0025(15) 
C26 0.0290(17) 0.037(2) 0.053(2) -0.0125(17) 0.0079(16) 0.0047(15) 
C27 0.0214(16) 0.039(2) 0.057(2) 0.0010(18) 0.0031(15) 0.0020(14) 
C28 0.0349(18) 0.045(2) 0.0239(16) -0.0072(14) 0.0049(13) 0.0007(15) 
C30 0.0377(19) 0.053(2) 0.0200(15) -0.0001(15) -0.0008(14) -0.0005(16) 
C31 0.0233(15) 0.0400(19) 0.0242(15) -0.0013(13) 0.0010(12) -0.0028(13) 
C32 0.043(2) 0.0310(18) 0.0308(17) -0.0093(14) 0.0045(15) 0.0017(15) 
C33 0.0237(15) 0.0206(14) 0.0314(16) 0.0023(12) 0.0018(12) 0.0009(11) 
C34 0.0297(16) 0.0365(18) 0.0269(16) 0.0111(14) -0.0034(13) -0.0045(14) 
C35 0.0213(14) 0.0321(16) 0.0244(15) 0.0046(13) -0.0014(11) -0.0068(12) 
C36 0.0244(15) 0.0329(16) 0.0189(14) 0.0063(12) -0.0021(11) -0.0069(12) 
C37 0.0245(14) 0.0263(15) 0.0216(14) 0.0022(12) 0.0021(11) 0.0045(12) 
C38 0.0210(14) 0.0279(16) 0.0227(14) 0.0030(12) 0.0046(11) -0.0005(11) 
C39 0.0200(14) 0.0260(15) 0.0248(14) -0.0020(12) 0.0017(11) -0.0010(11) 
C39A 0.0226(15) 0.058(2) 0.0253(16) 0.0045(16) 0.0051(13) -0.0040(15) 
C40 0.0159(13) 0.0279(16) 0.0267(15) 0.0017(12) 0.0011(11) -0.0019(11) 
C41 0.0194(13) 0.0245(14) 0.0190(13) 0.0009(11) 0.0004(10) -0.0008(11) 
C42 0.0192(13) 0.0242(14) 0.0215(13) 0.0049(11) 0.0005(10) -0.0008(11) 
F7 0.0426(11) 0.0230(10) 0.0426(11) -0.0030(8) 0.0083(9) 0.0003(8) 
F8 0.0827(17) 0.0361(11) 0.0233(10) 0.0049(8) 0.0128(10) 0.0203(11) 
F9 0.0541(13) 0.0296(10) 0.0293(10) -0.0005(8) -0.0080(9) 0.0022(9) 
F10 0.0325(12) 0.0703(17) 0.0773(18) -0.0260(14) 0.0161(12) -0.0022(11) 
B1 0.0274(18) 0.0283(19) 0.0281(18) 0.0008(14) 0.0051(14) 0.0004(14) 
F11 0.0454(13) 0.0505(14) 0.0440(12) 0.0037(10) -0.0067(10) -0.0088(11) 
F12 0.0329(13) 0.178(3) 0.0515(16) -0.0327(19) 0.0129(11) -0.0183(17) 
F13 0.121(2) 0.0495(15) 0.0276(11) 0.0022(10) -0.0024(13) 0.0299(15) 
F14 0.0576(15) 0.0333(12) 0.0880(19) -0.0037(12) 0.0034(14) 0.0049(11) 
B2 0.032(2) 0.044(2) 0.0271(18) 0.0016(17) 0.0034(15) 0.0052(17) 
C43 0.052(3) 0.037(2) 0.074(3) 0.002(2) -0.007(2) 0.0024(19) 
Cl1 0.0388(5) 0.0389(5) 0.1009(9) -0.0068(6) -0.0094(6) 0.0006(4) 
Cl2 0.0443(6) 0.0572(7) 0.0962(10) 0.0074(6) -0.0164(6) -0.0106(5) 
C44 0.032(2) 0.040(2) 0.132(5) -0.021(3) -0.012(3) -0.0009(18) 
Cl3 0.0679(8) 0.0642(8) 0.0955(10) -0.0242(7) 0.0136(7) -0.0064(6) 
Cl4 0.0504(7) 0.0946(10) 0.0698(8) -0.0019(7) 0.0108(6) -0.0088(6) 
  
_geom_special_details 
; 
 All esds (except the esd in the dihedral angle between two l.s. planes) 
 are estimated using the full covariance matrix.  The cell esds are taken 
 into account individually in the estimation of esds in distances, angles 
 and torsion angles; correlations between esds in cell parameters are only 
 used when they are defined by crystal symmetry.  An approximate (isotropic) 
 treatment of cell esds is used for estimating esds involving l.s. planes. 
; 
  
loop_ 
 _geom_bond_atom_site_label_1 
 _geom_bond_atom_site_label_2 
 _geom_bond_distance 
 _geom_bond_site_symmetry_2 
 _geom_bond_publ_flag 
S1 C19 1.779(3) . ? 
S1 C17 1.818(3) . ? 
S1 C21 1.869(3) . ? 
F1 C1 1.332(4) . ? 
F2 C1 1.319(4) . ? 
F3 C1 1.317(5) . ? 
O1 C7 1.192(4) . ? 
O2 C7 1.339(4) . ? 
O2 C15 1.481(3) . ? 
O3 C14 1.210(4) . ? 
C1 C7 1.529(5) . ? 
C2 C10 1.521(4) . ? 
C2 C4 1.537(5) . ? 
C3 C5 1.379(5) . ? 
C3 C11 1.388(5) . ? 
C4 C14 1.499(5) . ? 
C5 C8 1.385(5) . ? 
C6 C21 1.522(4) . ? 
C8 C13 1.389(4) . ? 
C9 C15 1.530(4) . ? 
C10 C20 1.521(4) . ? 
C11 C19 1.390(4) . ? 
C12 C18 1.535(4) . ? 
C12 C15 1.549(4) . ? 
C13 C19 1.389(4) . ? 
C14 C18 1.541(4) . ? 
C15 C21 1.553(4) . ? 
C16 C21 1.529(4) . ? 
C16 C20 1.543(4) . ? 
C17 C18 1.552(4) . ? 
C18 C20 1.549(4) . ? 
S2 C40 1.777(3) . ? 
S2 C36 1.826(3) . ? 
S2 C42 1.871(3) . ? 
F4 C22 1.236(6) . ? 
F5 C22 1.242(7) . ? 
F6 C22 1.274(5) . ? 
O4 C39A 1.188(5) . ? 
O5 C39A 1.337(4) . ? 
O5 C38 1.484(4) . ? 
O6 C35 1.209(4) . ? 
C22 C39A 1.510(6) . ? 
C23 C40 1.379(4) . ? 
C23 C26 1.390(5) . ? 
C24 C32 1.524(5) . ? 
C24 C30 1.530(5) . ? 
C25 C27 1.382(5) . ? 
C25 C31 1.384(4) . ? 
C26 C27 1.377(5) . ? 
C28 C38 1.521(4) . ? 
C30 C35 1.499(5) . ? 
C31 C40 1.399(4) . ? 
C32 C39 1.535(4) . ? 
C33 C42 1.533(4) . ? 
C33 C39 1.535(4) . ? 
C34 C42 1.525(4) . ? 
C35 C41 1.546(4) . ? 
C36 C41 1.548(4) . ? 
C37 C41 1.532(4) . ? 
C37 C38 1.547(4) . ? 
C38 C42 1.558(4) . ? 
C39 C41 1.545(4) . ? 
F7 B1 1.386(4) . ? 
F8 B1 1.394(4) . ? 
F9 B1 1.390(4) . ? 
F10 B1 1.382(4) . ? 
F11 B2 1.391(5) . ? 
F12 B2 1.357(5) . ? 
F13 B2 1.393(5) . ? 
F14 B2 1.368(5) . ? 
C43 Cl3 1.745(5) . ? 
C43 Cl4 1.746(5) . ? 
Cl1 C44 1.760(4) . ? 
Cl2 C44 1.774(5) . ? 
  
loop_ 
 _geom_angle_atom_site_label_1 
 _geom_angle_atom_site_label_2 
 _geom_angle_atom_site_label_3 
 _geom_angle 
 _geom_angle_site_symmetry_1 
 _geom_angle_site_symmetry_3 
 _geom_angle_publ_flag 
C19 S1 C17 108.36(14) . . ? 
C19 S1 C21 108.30(13) . . ? 
C17 S1 C21 98.99(13) . . ? 
C7 O2 C15 119.5(2) . . ? 
F3 C1 F2 107.4(3) . . ? 
F3 C1 F1 106.4(3) . . ? 
F2 C1 F1 108.7(3) . . ? 
F3 C1 C7 112.8(3) . . ? 
F2 C1 C7 111.0(3) . . ? 
F1 C1 C7 110.3(3) . . ? 
C10 C2 C4 110.5(3) . . ? 
C5 C3 C11 121.0(3) . . ? 
C14 C4 C2 111.8(3) . . ? 
C3 C5 C8 120.3(3) . . ? 
O1 C7 O2 129.1(3) . . ? 
O1 C7 C1 122.6(3) . . ? 
O2 C7 C1 108.3(3) . . ? 
C5 C8 C13 120.1(3) . . ? 
C2 C10 C20 111.7(3) . . ? 
C3 C11 C19 117.8(3) . . ? 
C18 C12 C15 113.0(2) . . ? 
C19 C13 C8 118.6(3) . . ? 
O3 C14 C4 123.1(3) . . ? 
O3 C14 C18 119.9(3) . . ? 
C4 C14 C18 116.9(3) . . ? 
O2 C15 C9 108.0(2) . . ? 
O2 C15 C12 111.6(2) . . ? 
C9 C15 C12 112.0(2) . . ? 
O2 C15 C21 101.3(2) . . ? 
C9 C15 C21 114.1(2) . . ? 
C12 C15 C21 109.4(2) . . ? 
C21 C16 C20 113.0(2) . . ? 
C18 C17 S1 107.02(19) . . ? 
C12 C18 C14 109.7(2) . . ? 
C12 C18 C20 109.5(2) . . ? 
C14 C18 C20 111.2(2) . . ? 
C12 C18 C17 109.5(2) . . ? 
C14 C18 C17 106.9(2) . . ? 
C20 C18 C17 110.1(2) . . ? 
C13 C19 C11 122.1(3) . . ? 
C13 C19 S1 113.4(2) . . ? 
C11 C19 S1 124.3(2) . . ? 
C10 C20 C16 112.7(2) . . ? 
C10 C20 C18 113.3(2) . . ? 
C16 C20 C18 108.7(2) . . ? 
C6 C21 C16 112.4(2) . . ? 
C6 C21 C15 114.2(2) . . ? 
C16 C21 C15 111.8(2) . . ? 
C6 C21 S1 108.5(2) . . ? 
C16 C21 S1 109.30(19) . . ? 
C15 C21 S1 99.78(18) . . ? 
C40 S2 C36 108.50(14) . . ? 
C40 S2 C42 107.06(14) . . ? 
C36 S2 C42 98.11(13) . . ? 
C39A O5 C38 119.6(3) . . ? 
F4 C22 F5 103.4(7) . . ? 
F4 C22 F6 109.4(5) . . ? 
F5 C22 F6 103.8(5) . . ? 
F4 C22 C39A 111.7(5) . . ? 
F5 C22 C39A 112.8(4) . . ? 
F6 C22 C39A 114.8(4) . . ? 
C40 C23 C26 117.9(3) . . ? 
C32 C24 C30 111.4(3) . . ? 
C27 C25 C31 120.6(3) . . ? 
C27 C26 C23 121.0(3) . . ? 
C26 C27 C25 120.2(3) . . ? 
C35 C30 C24 111.6(3) . . ? 
C25 C31 C40 117.9(3) . . ? 
C24 C32 C39 111.5(3) . . ? 
C42 C33 C39 113.2(2) . . ? 
O6 C35 C30 122.9(3) . . ? 
O6 C35 C41 120.5(3) . . ? 
C30 C35 C41 116.7(3) . . ? 
C41 C36 S2 107.59(19) . . ? 
C41 C37 C38 113.3(2) . . ? 
O5 C38 C28 109.1(2) . . ? 
O5 C38 C37 111.0(2) . . ? 
C28 C38 C37 112.3(3) . . ? 
O5 C38 C42 100.4(2) . . ? 
C28 C38 C42 114.2(3) . . ? 
C37 C38 C42 109.3(2) . . ? 
C33 C39 C32 111.7(3) . . ? 
C33 C39 C41 108.7(2) . . ? 
C32 C39 C41 113.7(3) . . ? 
O4 C39A O5 129.9(3) . . ? 
O4 C39A C22 121.4(3) . . ? 
O5 C39A C22 108.6(3) . . ? 
C23 C40 C31 122.4(3) . . ? 
C23 C40 S2 124.2(2) . . ? 
C31 C40 S2 113.3(2) . . ? 
C37 C41 C39 109.1(2) . . ? 
C37 C41 C35 110.0(2) . . ? 
C39 C41 C35 110.9(2) . . ? 
C37 C41 C36 109.8(2) . . ? 
C39 C41 C36 109.9(2) . . ? 
C35 C41 C36 107.1(2) . . ? 
C34 C42 C33 111.2(3) . . ? 
C34 C42 C38 115.0(3) . . ? 
C33 C42 C38 111.8(2) . . ? 
C34 C42 S2 109.2(2) . . ? 
C33 C42 S2 109.4(2) . . ? 
C38 C42 S2 99.55(19) . . ? 
F10 B1 F7 110.9(3) . . ? 
F10 B1 F9 108.9(3) . . ? 
F7 B1 F9 110.1(3) . . ? 
F10 B1 F8 109.9(3) . . ? 
F7 B1 F8 108.7(3) . . ? 
F9 B1 F8 108.2(3) . . ? 
F12 B2 F14 111.5(4) . . ? 
F12 B2 F11 109.3(3) . . ? 
F14 B2 F11 111.0(3) . . ? 
F12 B2 F13 110.5(3) . . ? 
F14 B2 F13 107.4(3) . . ? 
F11 B2 F13 107.0(3) . . ? 
Cl3 C43 Cl4 112.7(2) . . ? 
Cl1 C44 Cl2 111.7(2) . . ? 
  
_diffrn_measured_fraction_theta_max    0.998 
_diffrn_reflns_theta_full              30.54 
_diffrn_measured_fraction_theta_full   0.998 
_refine_diff_density_max    1.040 
_refine_diff_density_min   -1.099 
_refine_diff_density_rms    0.091 
